# Supplementary material
Source: PubMed Central journal article supplement (PMC7350689)

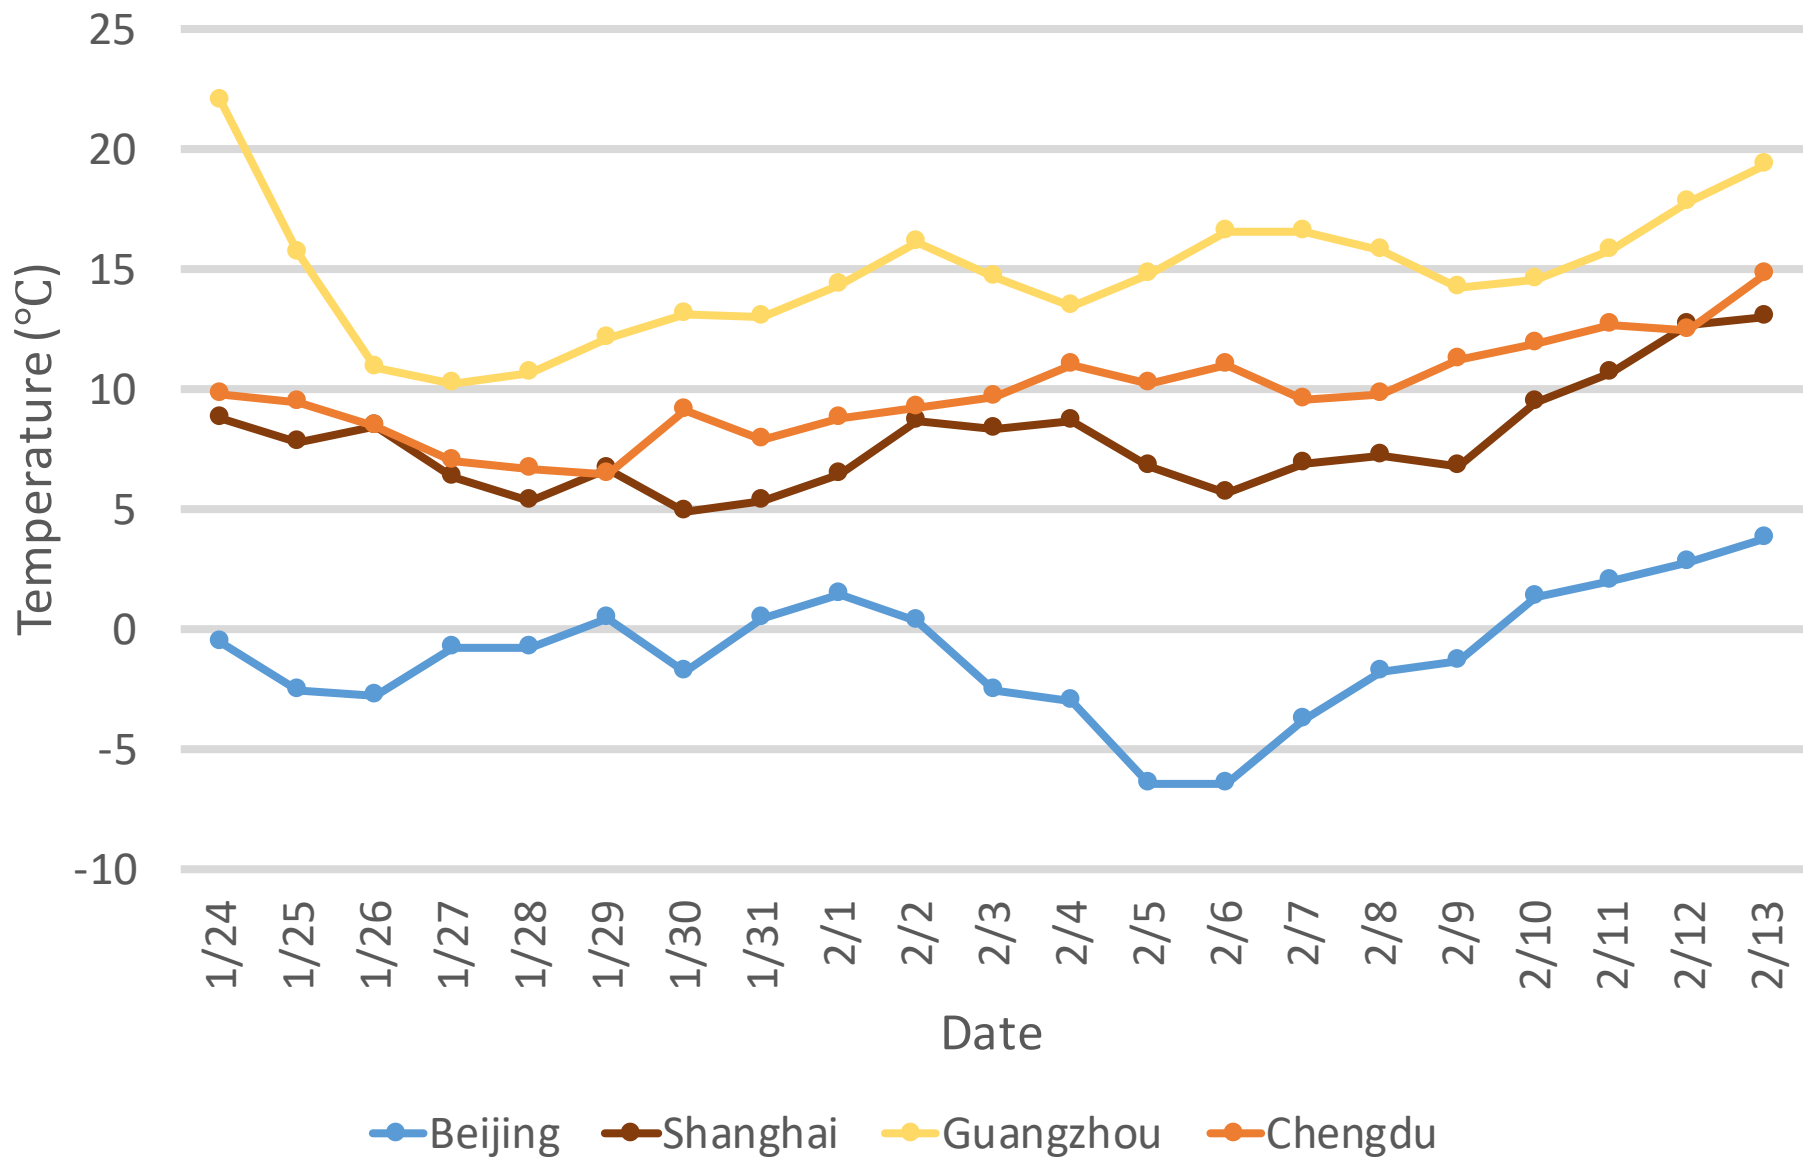

Supplement: 40249_2020_708_MOESM1_ESM.pdf [file 40249_2020_708_MOESM1_ESM.pdf]
